# Supplementary material for: Exploiting multi-wavelength aerosol absorption coefficients in a multi-time source apportionment study to retrieve source-dependent absorption parameters
Source: Copernicus journal article supplement (doi:10.5194/acp-2019-123), 2019-03-12
Supplement: Supplementary file 1 [file acp-2019-123-supplement.pdf]

**SUPPLEMENTAL MATERIAL**

**Exploiting multi-wavelength aerosol absorption coefficients in a multi-time source apportionment study  
to retrieve source-dependent absorption parameters**

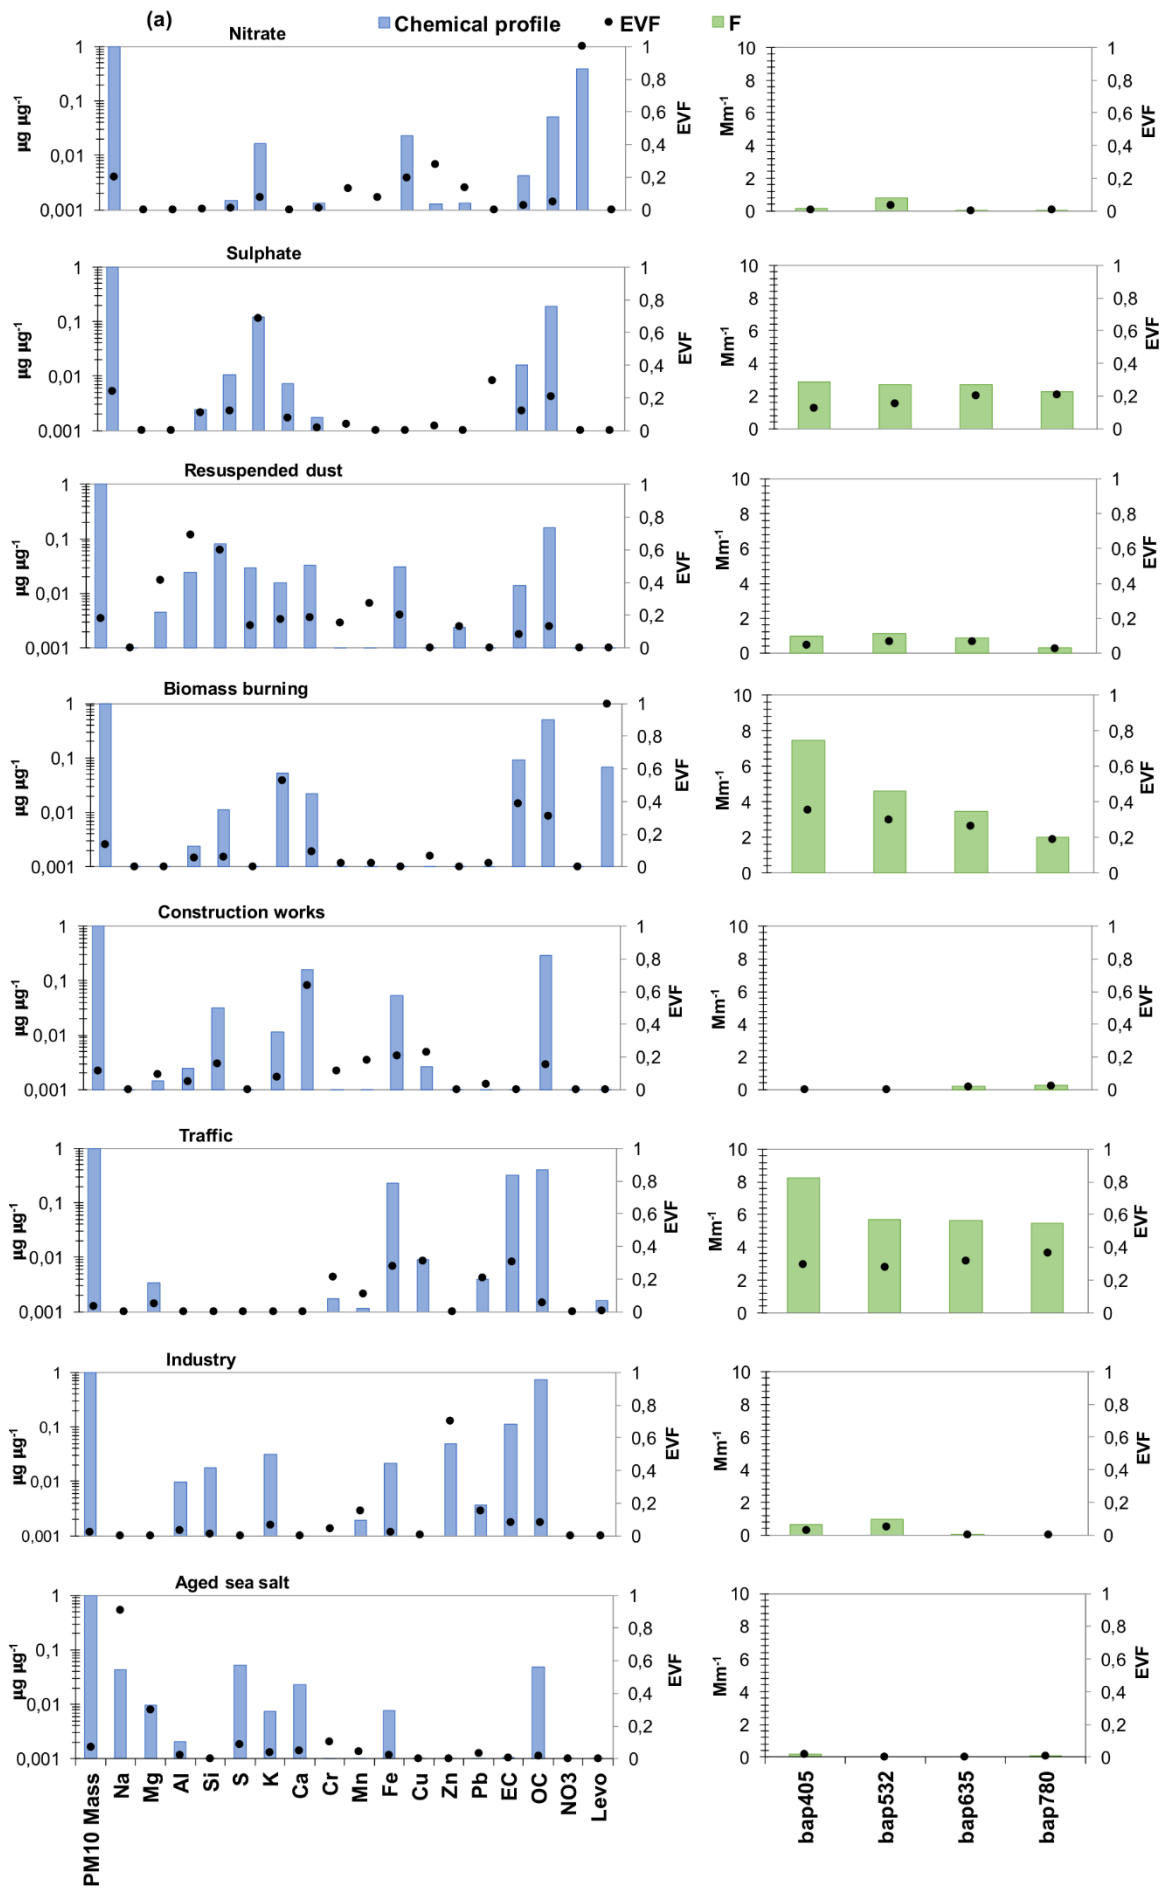

Figure S1: (a) Chemical profiles of the 8-factor base case solution (b)  $b_{ap}$  apportionment of the 8-factor base case solution.

| Factors            | Total [ $\mu\text{g m}^{-3}$ ] |
|--------------------|--------------------------------|
| Nitrate            | 10.4 (31 %)                    |
| Sulphate           | 6.2 (19 %)                     |
| Resuspended dust   | 5.5 (16 %)                     |
| Biomass burning    | 3.5 (11 %)                     |
| Construction works | 3.6 (11 %)                     |
| Traffic            | 1.7 (5 %)                      |
| Industry           | 1.1 (3 %)                      |
| Aged sea salt      | 1.3 (4 %)                      |

Table S1: Absolute and relative average source contributions to PM10 mass in the 8-factor base case solution.

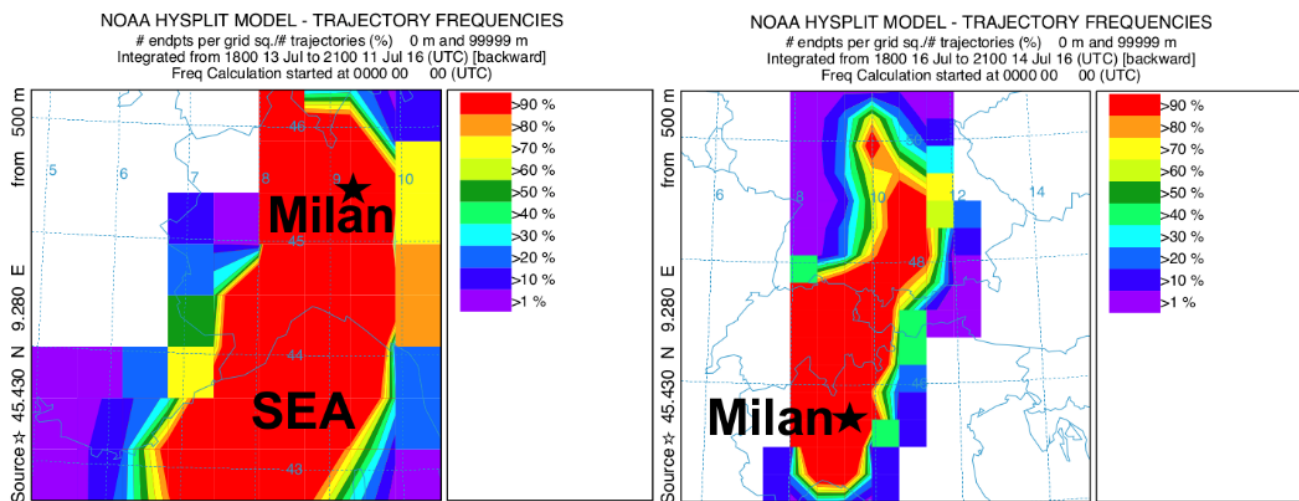

Figure S2: On the left, frequencies before and during the sea salt transport event; on the right, frequencies after the sea salt transport event.

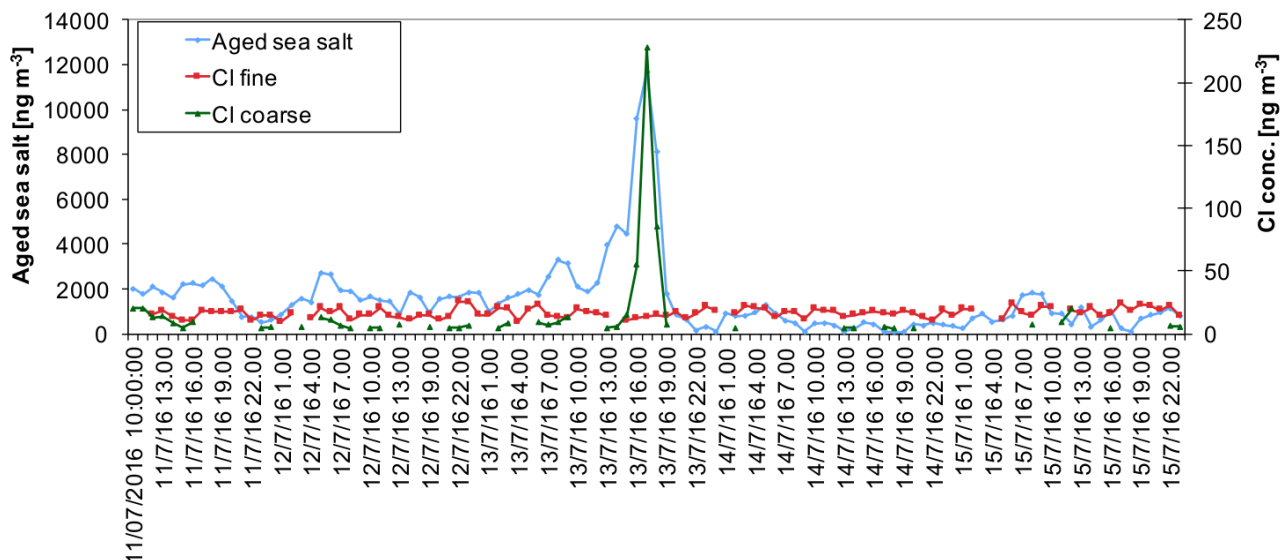

Figure S3: Temporal patterns of aged sea salt source retrieved from the multi-time model and Cl concentrations measured in atmosphere in the fine and coarse fractions.

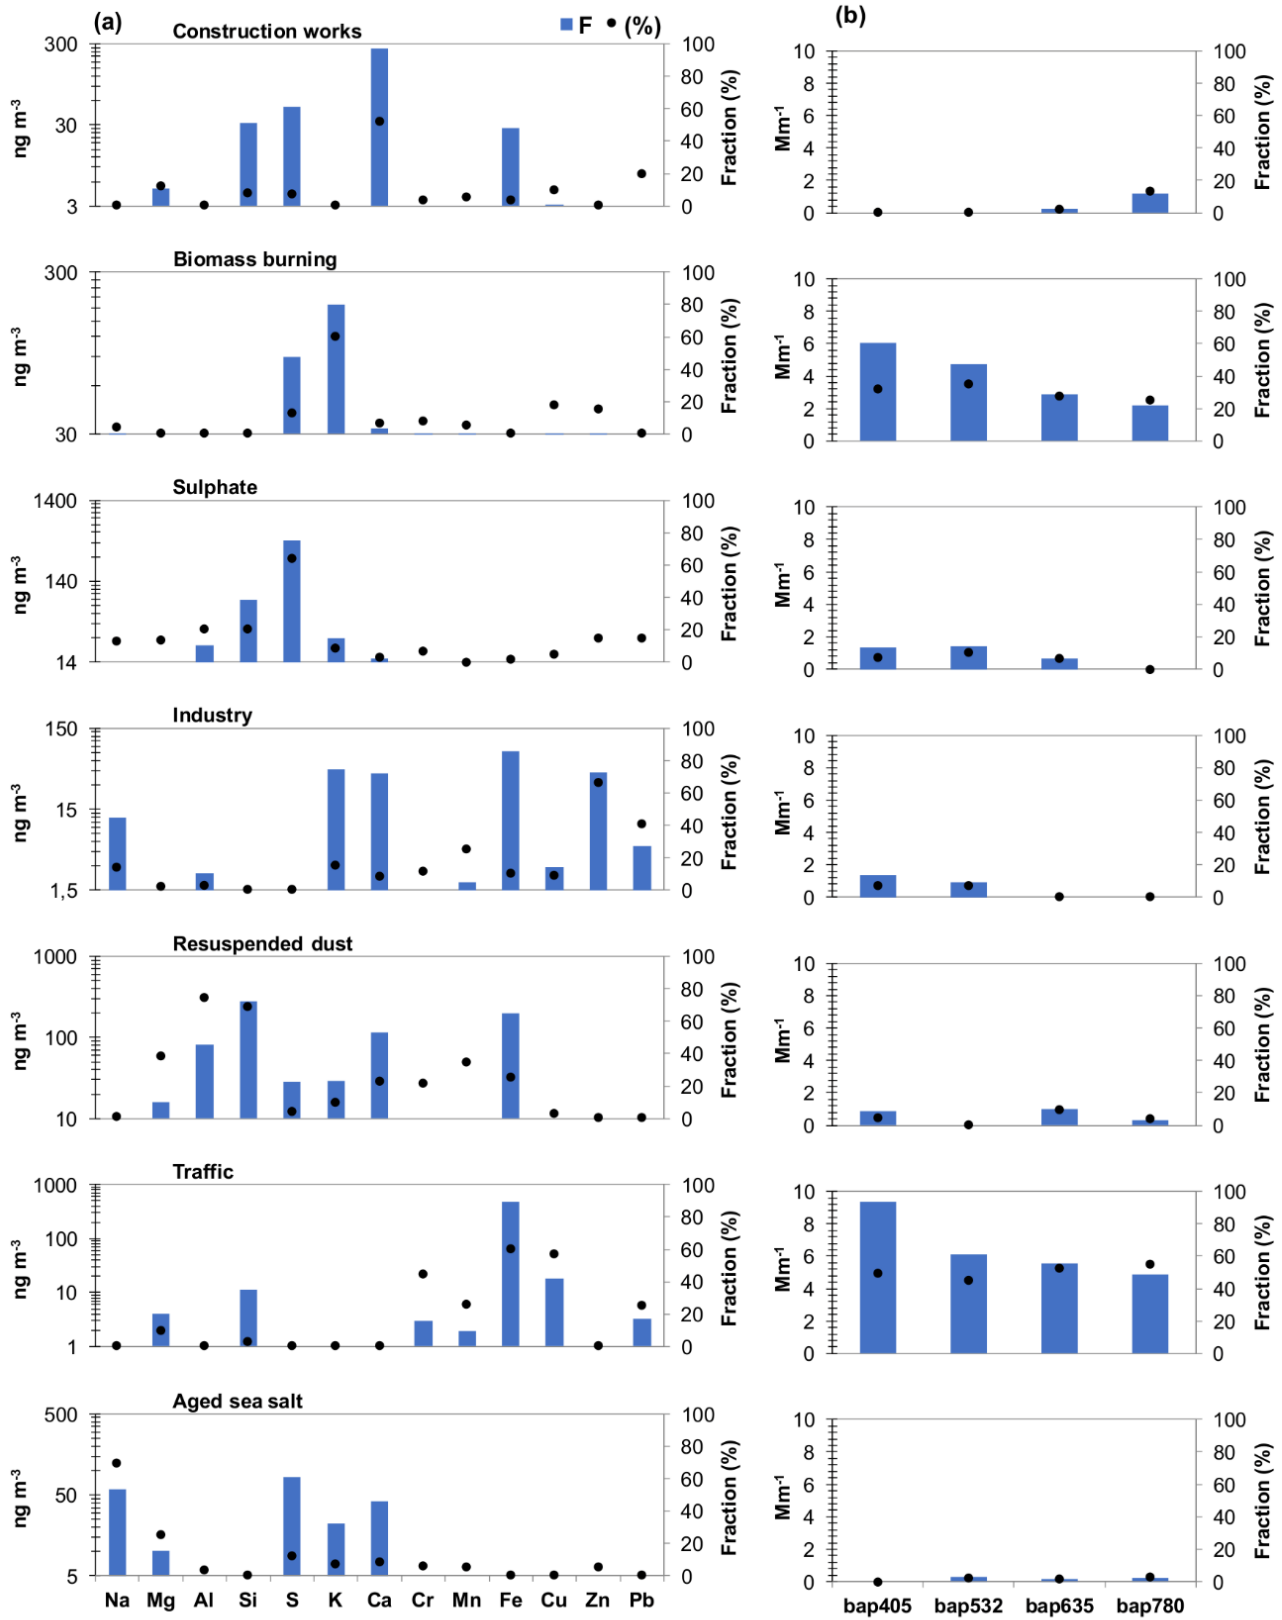

Figure S4: Source apportionment study performed with EPA PMF 5.0 on elemental concentrations and absorption coefficients at four wavelengths, both measured on high-time resolution samples collected by streaker sampler.

| <i>Measured in atmosphere</i> | $\lambda = 405 \text{ nm}$             |                   |       | $\lambda = 532 \text{ nm}$             |                   |       | $\lambda = 635 \text{ nm}$             |                   |       | $\lambda = 780 \text{ nm}$             |                   |       |
|-------------------------------|----------------------------------------|-------------------|-------|----------------------------------------|-------------------|-------|----------------------------------------|-------------------|-------|----------------------------------------|-------------------|-------|
|                               | $b_{ap}/EC$                            | $\sigma$          | $R^2$ |
| <b>Summer</b>                 | <b>14.2</b>                            | $\pm 0.5$         | 0.61  | <b>12.9</b>                            | $\pm 0.5$         | 0.61  | <b>11.1</b>                            | $\pm 0.4$         | 0.64  | <b>9.8</b>                             | $\pm 0.4$         | 0.67  |
| <b>Winter</b>                 | <b>17.8</b>                            | $\pm 0.4$         | 0.89  | <b>12.8</b>                            | $\pm 0.3$         | 0.90  | <b>11.2</b>                            | $\pm 0.3$         | 0.87  | <b>8.9</b>                             | $\pm 0.3$         | 0.79  |
| <b>All data</b>               | <b>17.3</b>                            | $\pm 0.3$         | 0.94  | <b>12.8</b>                            | $\pm 0.2$         | 0.94  | <b>11.2</b>                            | $\pm 0.2$         | 0.93  | <b>9.0</b>                             | $\pm 0.2$         | 0.87  |
| <i>Multi-time model</i>       | <b>25<sup>th</sup>-75<sup>th</sup></b> |                   |       | <b>25<sup>th</sup>-75<sup>th</sup></b> |                   |       | <b>25<sup>th</sup>-75<sup>th</sup></b> |                   |       | <b>25<sup>th</sup>-75<sup>th</sup></b> |                   |       |
|                               | <b><math>b_{ap}/EC</math></b>          | <b>percentile</b> |       | <b><math>b_{ap}/EC</math></b>          | <b>percentile</b> |       | <b><math>b_{ap}/EC</math></b>          | <b>percentile</b> |       | <b><math>b_{ap}/EC</math></b>          | <b>percentile</b> |       |
| <b>Biomass burning</b>        | <b>23.1</b>                            | 21.1 - 24.8       |       | <b>14.3</b>                            | 13.2 – 16.0       |       | <b>10.6</b>                            | 9.9 – 11.7        |       | <b>6.4</b>                             | 6.0 – 7.3         |       |
| <b>Fossil fuel</b>            | <b>13.7</b>                            | 12.7 – 14.2       |       | <b>10.2</b>                            | 9.6 – 10.4        |       | <b>8.8</b>                             | 8.2-9.1           |       | <b>8.6</b>                             | 7.6-8.9           |       |

Table S2  $b_{ap}$ -to-EC ratios for biomass burning and fossil fuel emission sources as measured in atmosphere and assessed by the multi-time model. Values measured in atmosphere ( $b_{ap}/EC$ ,  $\sigma$  and  $R^2$ ) result from a linear regression between experimental  $b_{ap}$  and EC concentrations. Results from multi-time model are retrieved considering the  $b_{ap}$  and EC apportioned in each source; the 25<sup>th</sup> and 75<sup>th</sup> percentile is estimated by the bootstrap analysis.
